## 1 **Optoribogenetic control of regulatory RNA molecules**

2

3 Sebastian Pilsl<sup>1</sup>, Charles Morgan<sup>1</sup>, Moujab Choukeife<sup>1</sup>, Andreas Möglich<sup>2</sup>, and Günter  
4 Mayer<sup>1,3\*</sup>

5

6 <sup>1</sup> Life and Medical Sciences (LIMES), University of Bonn, Gerhard-Domagk-Str.1, 53121  
7 Bonn, Germany

8 <sup>2</sup> Lehrstuhl für Biochemie, Photobiochemie, University of Bayreuth, Universitätsstraße 30,  
9 95440 Bayreuth, Germany

10 <sup>3</sup> Center of Aptamer Research & Development, University of Bonn, Gerhard-Domagk-Str. 1,  
11 53121 Bonn, Germany

12

13 \*Corresponding author: [gmayer@uni-bonn.de](mailto:gmayer@uni-bonn.de)

14

### 15 **Abstract**

16 Short regulatory RNA molecules underpin gene expression and govern cellular state and  
17 physiology. To establish a novel layer of control over these processes, we generated chimeric  
18 regulatory RNAs that interact reversibly and light-dependently with the light-oxygen-voltage  
19 photoreceptor PAL. By harnessing this interaction, the function of micro RNAs (miRs) and  
20 short hairpin (sh) RNAs in mammalian cells can be regulated in spatiotemporally precise  
21 manner. The underlying strategy is generic and can be adapted to near-arbitrary target  
22 sequences. Owing to full genetic encodability, it establishes unprecedented optoribogenetic  
23 control of cell state and physiology. The method stands to facilitate the non-invasive, reversible  
24 and spatiotemporally resolved study of regulatory RNAs and protein function in cellular and  
25 organismal environments.

26

27

28

29

30

31

## 32 **Introduction**

33 Short regulatory RNA molecules such as endogenous micro RNAs (miR) or synthetic short  
34 hairpin RNAs (shRNA) are essential mediators of gene expression<sup>1-3</sup>. They interact with  
35 defined complementary sites in the untranslated (UTR) or the coding regions of mRNA  
36 molecules, upon which translation is either inhibited or the mRNA is hydrolysed. Regulatory  
37 RNAs have become indispensable in the biosciences for the validation of gene or protein  
38 function in cells and *in vivo*<sup>4</sup>. Although the on-demand control of mRNA translation has been  
39 achieved at the levels of mRNA stability and ribosome processing, e.g., by introducing  
40 aptazymes or aptamers in the UTRs<sup>5-9</sup>, the direct control of the function of short regulatory  
41 RNAs, ultimately in a spatiotemporal manner, remains challenging. At the same time, it is  
42 highly demanded, as it would offer programmable, modular and generalizable control of target  
43 gene expression on the posttranscriptional level<sup>10-12</sup>. To this end, small-molecule-responsive  
44 siRNAs whose function can be controlled by theophylline or tetracycline<sup>13</sup> or conditional  
45 expressions systems of shRNAs<sup>14</sup> have been reported. These approaches extend towards the  
46 transcriptional regulation of miRs<sup>15</sup> or to aptazymes that control miR maturation in response to  
47 small molecules<sup>16</sup>. Atanasov *et al.* constructed *pre*-miR variants that functionally depend on the  
48 presence of doxycycline, mediated by a TetR-responsive aptamer<sup>17</sup>, which has been previously  
49 used in combination with the theophylline aptamer to control transcription<sup>18</sup>. Besides these  
50 strategies, modalities to sequester miRs<sup>19-21</sup> or to inhibit their function by small molecules<sup>22</sup>  
51 were developed and applied in cell culture and *in vivo*. Most of these approaches rely on the  
52 exogenous addition of small molecules, which *per se* might interfere with other biological  
53 processes, have limited availability and stability *in vivo*, suffer from diffusional spread, and are  
54 of restricted reversibility<sup>23</sup>. To overcome certain of these limitations, light-dependent control  
55 of regulatory RNA has also been described<sup>24-26</sup>, but the pertinent approaches invariably require  
56 chemical synthesis and the exogenous addition of the modified RNAs to biological systems. By  
57 contrast, entirely genetic approaches to gain spatiotemporal control over regulatory RNA  
58 function remain elusive but are highly desirable, as they would offer a plethora of applications  
59 to precisely and reversibly control gene expression and downstream processes.

60 Here, we devise a fully genetically encodable, generic approach that achieves light-dependent  
61 control of *pre*-miR and shRNA activity. We constructed chimeric RNA molecules consisting  
62 of mature miR and siRNA sequences conjoined with an RNA aptamer that binds to the light-  
63 oxygen-voltage (LOV) photoreceptor PAL in a light-dependent manner<sup>27,28</sup>. The chimeric  
64 RNAs enable the spatiotemporal control of short regulatory RNA function in mammalian cells,

65 as we showcase for the light-dependent control of gene expression and cell-cycle progression.  
66 This hitherto unavailable modality establishes a versatile RNA control system for analysing  
67 various protein and miR functionalities in a reversible, spatiotemporally resolved, and non-  
68 invasive manner, and with full genetic encoding. Owing to the modularity of the chimeric  
69 RNAs, the technology readily applies to near-arbitrary shRNAs.

70

## 71 **Results**

### 72 **PAL-mediated regulation of *pre*-miR activity.**

73 Our design of light-responsive *pre*-miRs anticipates an altered processivity of short regulatory  
74 RNAs by Dicer owing to light-activated binding of the light-oxygen-voltage receptor PAL to  
75 the apical loop domain<sup>28-30</sup>. To implement this design, we embedded the cognate aptamer  
76 domain of PAL in the apical loop of short regulatory RNAs. We hypothesized that thereby  
77 regulatory RNA function can be controlled by blue light (**Scheme 1**).

78

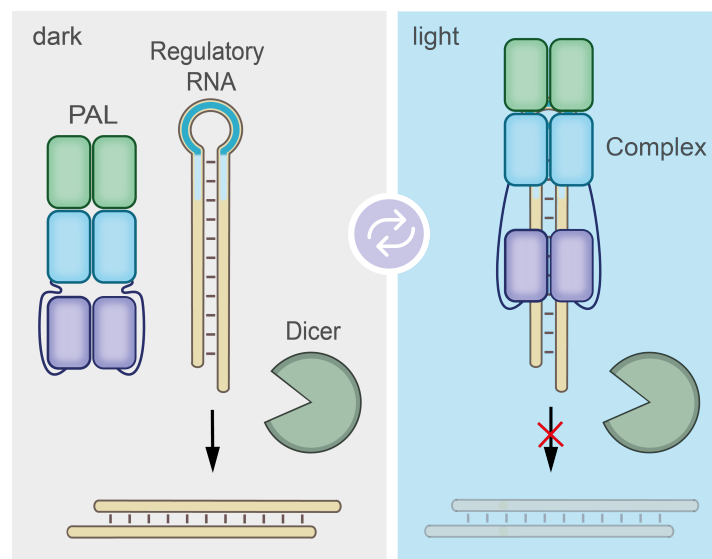

79

80 **Scheme 1: General design of light-dependent regulatory RNAs.** The PAL protein reversibly binds to its cognate  
81 RNA aptamer (highlighted in blue) embedded in the apical loop domain of a regulatory RNA (highlighted in light  
82 orange) in the light and thereby influences regulatory RNA function.

83

84 We generated *pre*-miR variants by replacing the apical loop domain with the PAL binding RNA  
85 aptamer 53 (**Fig. 1a, Supporting Table 1**). Notably, the RNA aptamer 53 interacts  
86 preferentially with the light-adapted state of PAL and to a much lesser extent with its dark-  
87 adapted conformation (**Supporting Fig. 3a,b**). We first generated aptamer-modified variants  
88 of *pre*-miR-21 (SHA, **Fig. 1a**) and analysed them in reporter gene assays that employ the  
89 expression of secreted *Metrida* luciferase or of enhanced green fluorescent protein (eGFP) with  
90 miR-21 target sites embedded in the 3'-UTRs of the respective mRNA (**Supporting Fig.**

91 **1a,b,2)**<sup>31</sup>. As controls, we constructed *pre*-miR-21 variants that bear a single point mutant  
92 (G11C) within the PAL aptamer that renders them binding-incompetent (SHC, SHD), a non-  
93 functional miR-21 domain (SHB, SHD)<sup>32</sup>, or with both domains altered (SHD, **Fig. 1a**).  
94 Interaction experiments *in vitro* revealed light-dependent binding of SHA and SHB to PAL,  
95 similar to the parental aptamer (53), whereas *pre*-miR variants with mutated aptamer domains  
96 (SHC, SHD) did not bind (**Supporting Fig. 3a,b**). For all experiments, a transgenic HEK293  
97 cell line stably expressing mCherry-PAL (HEK293PAL) at an average concentration of 1  $\mu$ M  
98 was used (**Supporting Fig. 4**). The *pre*-miR-21 variants were transcribed under the control of  
99 the U6 promoter from plasmids<sup>33</sup> co-transfected with the luciferase reporter. Whereas SHA  
100 suppressed luciferase expression in darkness, irradiation with blue light ( $\lambda = 465$  nm) induced  
101 reporter gene expression by 4.4-fold to 27% of the maximal value (**Fig. 1b,d**). Replacing either  
102 the miR-21 domain with a non-targeting RNA (SHB) or the aptamer domain by a non-binding  
103 point mutant (SHC) resulted in a loss of light-regulation (**Fig. 1b,d, Supporting Fig. 5**).  
104 Likewise, the *pre*-miR21 variant having both RNA domains altered (SHD) neither suppressed  
105 gene expression nor showed any light dependency (**Fig. 1b,c**). Analogous results were obtained  
106 for the eGFP reporter gene (**Fig. 1d,e, Supporting Fig. 7,8**, for details on eGFP gating strategy  
107 see **Supporting Fig. 6a**), in that SHA inhibited expression in darkness, whereas a 4.4-fold  
108 induction of eGFP was observed in light (**Fig. 1d,e**). SHB and SHD did not inhibit eGFP  
109 expression, whereas SHC did, and none of the three variants exhibited light dependency (**Fig.**  
110 **1d**). Intrinsic levels of argonaute 2 (AGO2) have been shown to limit RNA silencing  
111 efficiency<sup>34</sup>. Therefore, we co-expressed AGO2 and observed a more pronounced inhibition of  
112 eGFP expression by SHA and SHC in darkness (**Fig. 1f,g, Supporting Fig. 9,10**). Irradiation  
113 induced eGFP expression in the cells harboring SHA by 9-fold (**Fig. 1g**). By contrast,  
114 experiments using SHB, SHC and SHD did not reveal any light dependency (**Fig. 1f,g**).  
115 We next assessed the reversibility of the approach using the luciferase reporter system. To this  
116 end, HEK293PAL cells harboring SHA were incubated for 19 h under blue light (**Fig. 1h-j,**  
117 **Supporting Fig. 11**). Subsequently, the cells were kept in darkness for a further 24 h. An  
118 increase of luciferase activity in the cell culture supernatants was observed after 19 h in light  
119 and a reduction when cells were kept in the dark afterwards (**Fig. 1i,j**). In turn, cells kept first  
120 in darkness did not reveal luciferase expression (**Fig. 1k-m, Supporting Fig. 12**), but luciferase  
121 activity was detected when cells were subsequently exposed to light conditions (**Fig. 1l,m**).  
122 Cells having SHC did not reveal light-dependent luciferase expression (**Fig. 1i,j,l,m,**  
123 **Supporting Fig. 11,12**). We also demonstrated spatial control of reporter gene expression using  
124 a photomask on HEK293PAL cells during irradiation (**Fig. 1n**). Expression of SHA resulted in

125 eGFP expression predominantly in light-exposed areas, whereas eGFP expression was  
 126 observed independently of the irradiation status in the presence of SHB (Fig. 1n).  
 127 To better characterize the processed miRs, we analysed them by 3' miR-RACE (rapid  
 128 amplification of cDNA ends). Compared to reported natural *pre*-miR-21, we observed altered  
 129 processing of SHA at the 3' end of miR-21-5p (Supporting Table 2). We attribute this  
 130 observation to using the U6 promoter for *pre*-miR-21 expression which requires an additional  
 131 G-nucleotide for efficient transcription and, thus, induces altered Dicer processing<sup>35</sup>.  
 132

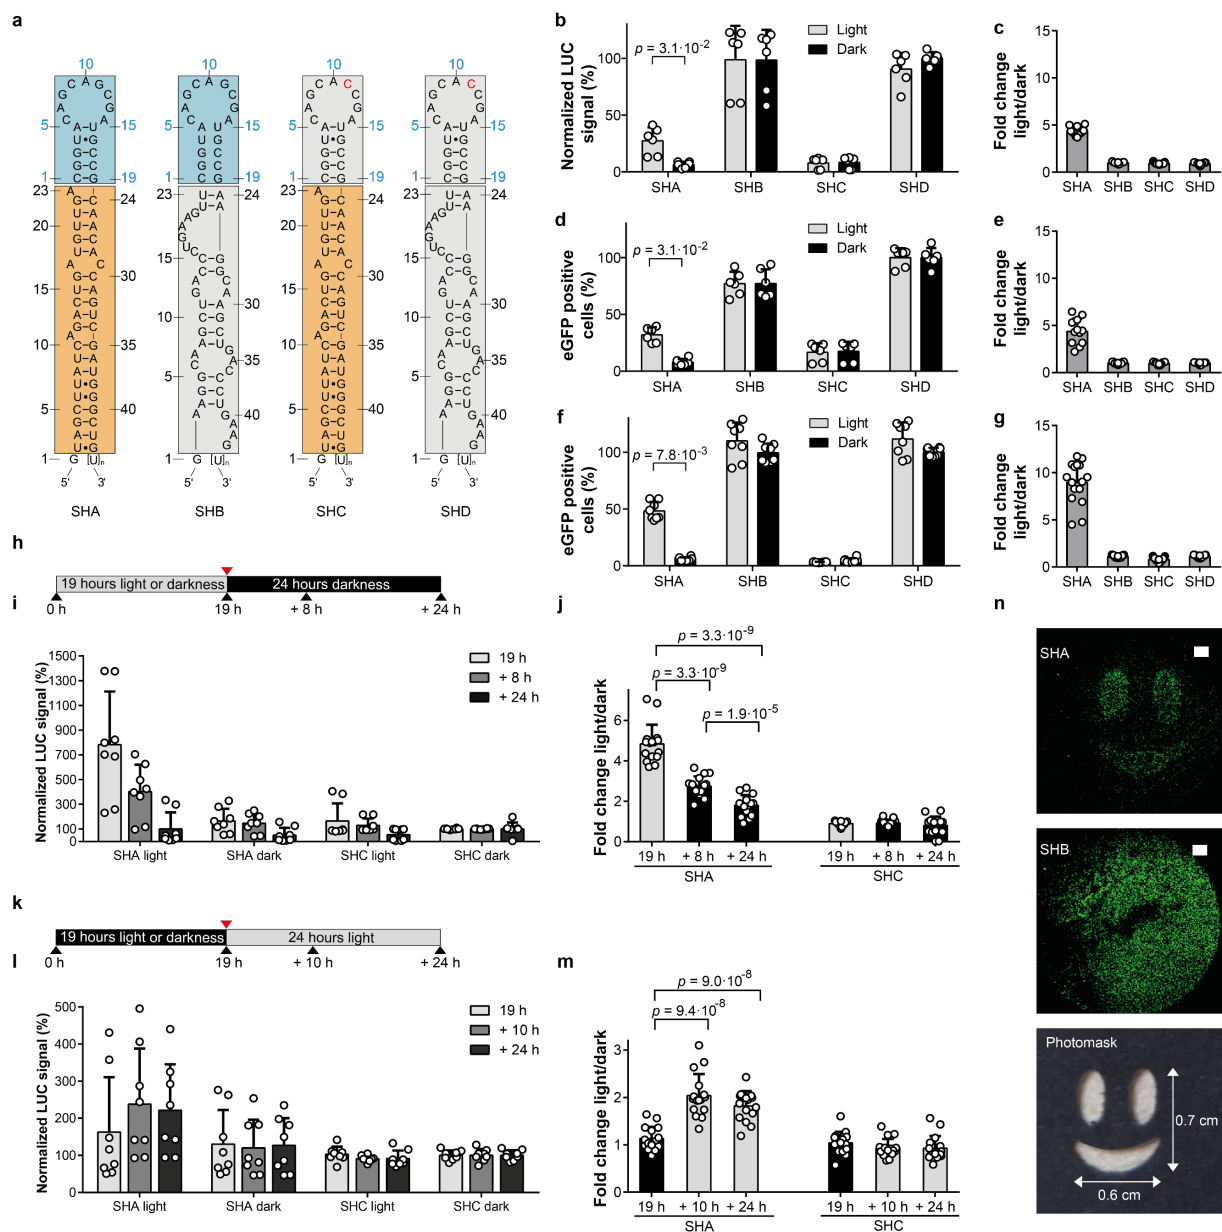

133

134 **Fig. 1 | A *pre*-miR21-aptamer chimera enables light-control of gene expression.** a, Schematic representation of  
 135 the *pre*-miR21 variants and corresponding controls. Blue boxes: aptamer domain, orange boxes: miR21 domain,  
 136 grey boxes: aptamer point mutant or control miR. b, Luciferase expression after transfection of the indicated *pre*-  
 137 miR21 variants. Values are normalized to SHD incubated in darkness. c, Fold changes calculated from light vs.  
 138 dark conditions from (b). d, Number of cells expressing eGFP after transfection of the indicated *pre*-miR21

139 variants. Values are normalized to SHD incubated in darkness. **e**, Fold changes calculated from light vs. dark  
140 conditions from **(d)**. **f**, Number of cells expressing eGFP in the presence of elevated levels of AGO2 and after  
141 transfection of the indicated *pre*-miR21 variants. Values are normalized to SHD incubated in darkness. **g**, Fold  
142 changes calculated from light vs. dark conditions from **(f)**. **b-e**, N = three biologically independent experiments  
143 performed in duplicates. Grey bars: light conditions, black bars: dark conditions. Dark grey bars: fold changes. **c-**  
144 **g**, Grey bars: cells incubated under light conditions, black bars: cells incubated in darkness. **b-f**, Wilcoxon two-  
145 sided signed-rank test was used for statistical analysis as a paired observation was assumed. **h**, Illumination  
146 protocol applied in **(i)** and **(j)**. **i**, Luciferase expression level of cells expressing SHA or SHC. Shown are  
147 normalized values to SHC in darkness. **j**, Fold changes calculated from light vs. dark conditions from **(i)**. **k**,  
148 Illumination protocol applied in **(l)** and **(m)**. **l**, Expression level of luciferase of cells expressing SHA or SHC.  
149 Shown are normalized values to SHC in darkness. **m**, Fold changes calculated from light vs. dark conditions from  
150 **(l)**. **b-m**, Values are means  $\pm$  s. d. **f-m** of four biologically independent cultures in duplicates. **j-m**, Two-sided  
151 Mann-Whitney *U* test was used for statistical analysis as an unpaired observation was assumed. **n**, Spatial  
152 patterning of eGFP expression after transfection with SHA (top panel) or SHB (middle panel). Irradiation was  
153 done on cells covered with a photomask (bottom panel); white bars: 1000  $\mu$ m.

154

### 155 **PAL-mediated regulation of shRNA activity**

156 We next investigated whether the PAL-aptamer system can also be applied to shRNA molecules  
157 in a more generic manner to thereby enable versatile optogenetic control of RNA interference<sup>36</sup>.  
158 Initially, we constructed two shRNAs (SH1, SH2) that target different sites within the eGFP  
159 mRNA coding region (**Supporting Fig. 1c**) and conjoined them with the PAL aptamer (**Fig.**  
160 **2a,b**). The expression of eGFP in HEK293PAL cells harboring SH1 or SH2 was light-  
161 responsive, with SH1 being more efficient in eGFP suppression in the dark (**Fig. 2c,d**,  
162 **Supporting Fig. 13-16**). As a control we used the miR-21-targeting SHA (**Fig. 1a**), which did  
163 not inhibit eGFP expression (**Fig. 2c,d**, **Supporting Fig. 13-17**, for details on eGFP gating  
164 strategy see **Supporting Fig. 6b**), as the miR target site is absent in the reporter mRNA  
165 employed in this experiment (**Supporting Fig. 1c**). Structural variations of one or two  
166 nucleotides surrounding the Dicer cleavage site are common motifs found in natural *pre*-miRs  
167 and shRNAs<sup>37</sup>. These motifs alter the accuracy of shRNA processing and, thus, gene silencing  
168 efficacy<sup>38</sup>. We hence extended our study towards examining the impact of the nucleotides'  
169 identity in the hinge region that connects the siRNA with the aptamer domain on shRNA  
170 performance. To this end, we designed 8 variants with single nucleotide bulges in the hinge  
171 region of SH1 (**Fig. 2d**) located either up- (SH3, SH4, SH5, SH6) or downstream (SH7, SH8,  
172 SH9, SH10) of the aptamer domain (**Fig. 2e**). All variants demonstrated light-dependent  
173 induction of eGFP expression but with varying efficiency (**Fig. 2f**). An upstream C (SH6) or a  
174 downstream G (SH9) nucleotide, relative to the aptamer domain, revealed the lowest  
175 expression, upstream A (SH3) or G (SH5) nucleotides or downstream A (SH7), U (SH8) or C



176 (SH10) nucleotides exhibited very similar properties. Likewise, the suppression efficiency of  
177 shRNAs in the dark varied among the constructs (**Supporting Fig. 13-15**). The observed fold  
178 changes of eGFP expression (light vs. dark) are comparable across all shRNAs with SH9 having  
179 the lowest induction rate (**Fig. 2g**). In turn, an upstream U nucleotide (SH4) revealed similar  
180 fold changes (**Fig. 2g**) but a higher level of light-induced eGFP expression (**Fig. 2f**). Therefore,  
181 we chose A and U residues as representatives in the SH2 hinge region variants and included G  
182 (SH15) as a less efficient control. Single nucleotides inserted into the hinge regions of SH2 led  
183 to an improved eGFP knockdown in the dark (**Fig. 2h,i, Supporting Fig. 15**), and all variants  
184 remained light-responsive. An adenine (SH11) or uridine (SH12) nucleotide at the hinge region  
185 upstream of the aptamer domain led to the highest number of eGFP-positive cells (**Fig. 2i**), and  
186 SH14 revealed the strongest increase of eGFP expression upon irradiation (15.3. fold) (**Fig. 2j**).  
187 SH16 with a mutated aptamer domain (G11C) did not reveal light induced eGFP expression  
188 (**Fig. 2h,i**). Likewise, light-dependent induction of eGFP expression was also evident from  
189 fluorescence microscopy studies for on the shRNA variants (**Fig. 2k, Supporting Fig. 17**) SH1  
190 (original hinge region), SH3 (intermediate performance), SH4 (highest number of eGFP  
191 positive cells when incubated in light), SH12 (second highest number of eGFP positive cells  
192 when incubated in light), and SH14 (highest light vs. dark fold change). *In vitro* binding studies  
193 verified light-dependent interaction with PAL of shRNA variants with engineered hinge regions  
194 (**Supporting Fig. 3a,b**), indicating that these variations do not directly interfere with PAL  
195 binding but affect shRNA processivity. Of key importance, these findings testify to the modular  
196 design of the underlying chimeric RNAs and indicate that the domains for PAL-binding and  
197 mRNA-targeting are non-overlapping. As a corollary, we reasoned that near-arbitrary targeting  
198 domains should be accommodable with our technology.  
199

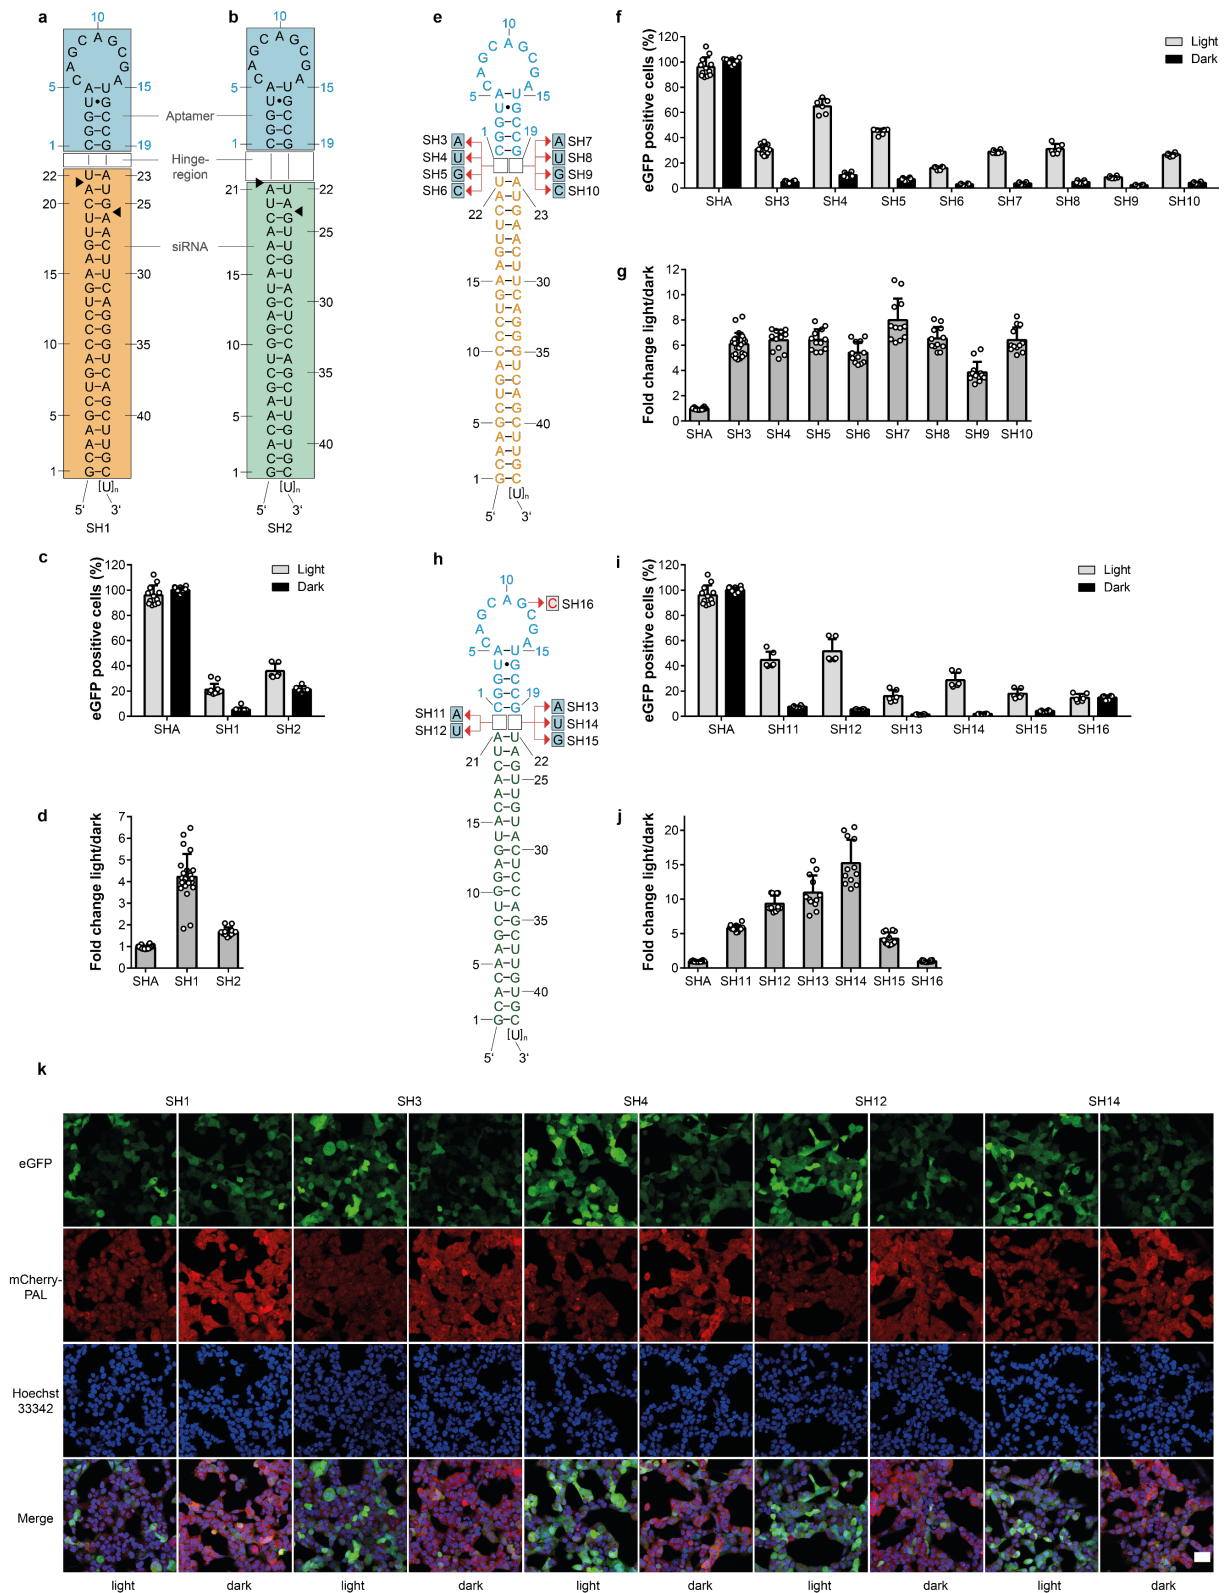

200

201 **Fig. 2| Design of shRNAs for the light-dependent expression of eGFP.** Two different siRNA sequences SH1  
 202 (orange box, **a**) and SH2 (green box, **b**) targeting eGFP mRNA were conjoined with the PAL aptamer (blue boxes)  
 203 as apical loop domains. Black arrows indicate a putative preferential dicer cleavage site<sup>39</sup>. **c**, Number of cells  
 204 expressing eGFP after transfection of SH1 or SH2. Values are normalized to SHA (**Fig. 1a**) in darkness. **d**, Fold  
 205 changes calculated from light vs. dark conditions from (**c**). **e**, Single nucleotide permutations of the hinge region  
 206 in SH1 and their impact on eGFP expression and light-dependency (**f**). Values are normalized to SHA in darkness.



207 **g**, Fold changes calculated from light vs. dark conditions from **(f)**. **h**, Single nucleotide permutations of the hinge  
208 region in SH2 and their impact on eGFP expression and light-dependency **(i)**. Values are normalized to SHA in  
209 darkness. **j**, Fold changes calculated from light vs. dark conditions from **(i)**. **k**, Fluorescence microscopy images  
210 of cells transfected with the indicated shRNA variants. Cells were incubated under either light or dark conditions.  
211 Scale bar: 40  $\mu$ m. **c-k**, All experiments were performed in duplicates and three independent replicates. Grey bars:  
212 light conditions, black bars: dark conditions. Dark grey bars: fold changes. Values are means  $\pm$  s.d.

213

## 214 **Optoribogenetic control of cell cycle progression**

215 We hence extended our approach to regulating the expression of endogenous proteins via  
216 shRNAs. We chose cyclin B1 and CDK1 as targets, as they are both essential for the transition  
217 from the gap-2 ( $G_2$ ) to the mitosis (M) phase of the cell cycle<sup>40</sup>. Variations of the expression  
218 levels of cyclin B1 and CDK1 have phenotypic consequences and alter the distribution of cells  
219 in different stages of the cell cycle<sup>41,42</sup>. First, we generated shRNAs targeting cyclin B1 with  
220 varied hinge nucleotides, having either an adenine (SHCB1) or uridine (SHCB2) upstream or  
221 uridine (SHCB3) downstream of the aptamer domain (**Fig. 3a**). HEK293PAL cells having the  
222 shRNAs SHCB1-3 in darkness (i.e. cyclin B1 knockdown condition) accumulated in the  $G_2/M$   
223 phase (**Fig. 3b**, **Supporting Fig. 18,19**). Upon irradiation, the number of cells in  $G_2/M$  phase  
224 was significantly reduced in cells having SHCB1 (**Fig. 3b**, **Supporting Fig. 18,19**), indicating  
225 the recovery of normal cell cycle propagation. By contrast, propagation was not recovered upon  
226 irradiation for the binding-incompetent aptamer variants of SHCB1 (G11C, SHCB1m) (**Fig.**  
227 **3b**). SHCB2 and SHCB3 did not affect cell cycle propagation when irradiated (**Fig. 3b**). Based  
228 on these results, we constructed PAL-dependent shRNA variants of CDK1 having an adenine  
229 nucleotide in the hinge region upstream of the aptamer (SHCDK1, **Fig. 3c**). HEK293PAL cells  
230 having the shRNAs SHCDK1 in darkness also accumulated in the  $G_2/M$  phase (**Fig. 3d**,  
231 **Supporting Fig. 18,19**). Upon irradiation, the number of cells in  $G_2/M$  phase was significantly  
232 reduced (**Fig. 3d**, **Supporting Fig. 18,19**). Cells having the PAL-binding deficient mutant  
233 shRNA SHCDK1m accumulated in the  $G_2/M$  phase irrespective of the irradiation status (**Fig.**  
234 **3b,d**, **Supporting Fig. 18,19**). No accumulation of cells in the  $G_2/M$  phase was observed when  
235 cells expressed the non-targeting SH3 or were untreated (**Supporting Fig. 20**). However, a  
236 slight accumulation of cells in  $G_2/M$  phase was observed upon irradiation (**Supporting Fig.**  
237 **20**), most likely because of secondary irradiation effects on cells<sup>43</sup>. SHCB1 or SHCDK1 led to  
238 a decrease of cyclin B1 and CDK1 expression, respectively, which was reversed by irradiation  
239 (**Fig. 3e-g**, **Supporting Fig. 21**). Variants of the shRNAs deficient for PAL binding (SHCB1m,  
240 SHCDK1m) suppressed protein expression independently of light (**Fig. 3e-g**). The non-  
241 targeting shRNA SH3 (**Fig. 2b**) did not affect cyclin B1 and CDK1 expression, the expression

242 levels of both proteins were similar those when cells were untreated (**Fig. 3e-g, Supporting**  
 243 **Fig. 21**). Of note, the shRNA variants targeting cyclin B1 did not affect CDK1 expression and  
 244 *vice versa* (**Fig. 3e, Supporting Fig. 21**).  
 245

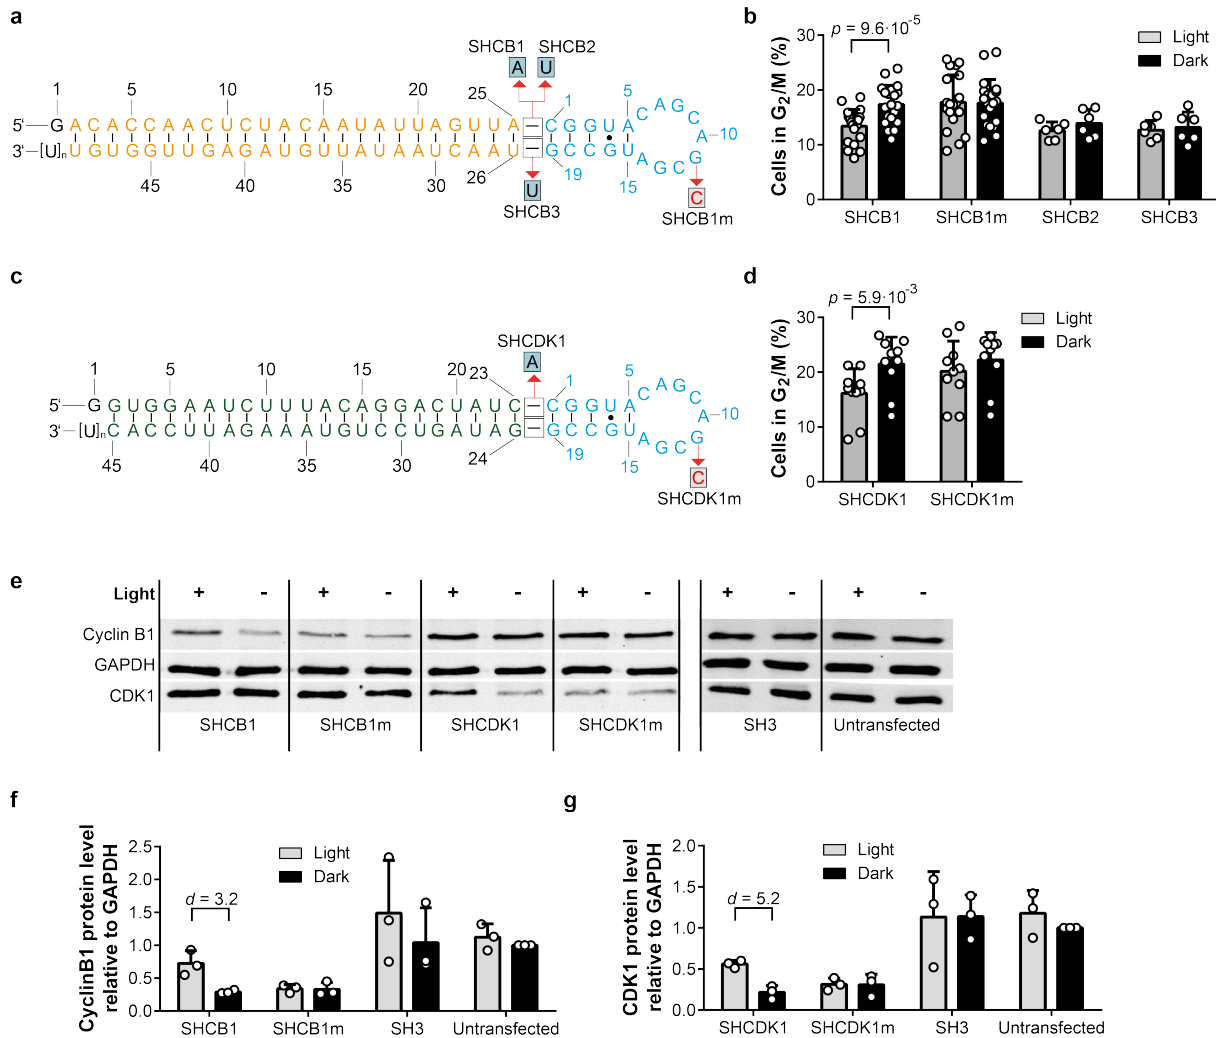

246  
 247 **Fig. 3| Optoribogenetic control of the mammalian cell cycle. a**, shRNA variants used to control cyclin B1 gene  
 248 expression. Blue: aptamer domain; orange: siRNA domain. **b**, Percentages of HEK293PAL cells in G<sub>2</sub>/M phase  
 249 of the cell cycle when transfected with indicated shRNAs targeting cyclin B1. **c**, shRNA variants used to control  
 250 CDK1 gene expression. Blue: aptamer domain; green: siRNA domain. **d**, Percentages of HEK293PAL cells in  
 251 G<sub>2</sub>/M phase of the cell cycle when transfected with indicated shRNAs targeting CDK1. **b,d**, N = at least three  
 252 biologically independent experiments performed in duplicates. **b**, The identity of SHCB1 and SHCB1m was  
 253 blinded and double-blinded in one experiment, each. **d**, The identity of SHCDK1 and SHCDK1m was blinded and  
 254 double-blinded in one experiment, each. **b,d**, Wilcoxon two-sided signed-rank test was used for statistical analysis.  
 255 **e**, Representative western blot image showing cyclin B1, CDK1 and GAPDH protein expression after transfection  
 256 with the indicated shRNAs (for complete blots see **Supporting Fig. 21**). **f, g**, Quantification of cyclin B1 and  
 257 CDK1 protein levels using pixel densitometry (n = three independent experiments). **f, g**, Cohen's *d* effect size was  
 258 used for statistical analysis. Values were normalized to non-transfected cells incubated in darkness  
 259 (Untransfected). **b,d,f,g**, Grey bars: cells incubated under light conditions, black bars: cells incubated under dark  
 260 conditions. Values are means ± s.d.

261  
262  
263  
264  
265  
266  
267  
268  
269  
270  
271  
272  
273  
274  
275  
276  
277  
278  
279  
280  
281  
282  
283  
284  
285  
286  
287  
288  
289  
290  
291  
292  
293  
294

## Discussion

In conclusion, we demonstrate the fully genetically encodable light-control of miR and shRNA molecules in mammalian cells. The approach utilizes an aptamer that under blue light binds tightly and specifically to the photoreceptor protein PAL, and this interaction was shown to impact miR and shRNA function in regulating gene expression. We thus created an encoded on-switch, complementing a previously reported off-switch in which the PAL aptamer was embedded directly in the 5'UTR of mRNAs<sup>28</sup>. By offering full genetic encodability, reversibility, and noninvasiveness combined with a small genetic footprint (ca. 1.1 kb), our approach transcends previous approaches for controlling regulatory RNA activity. Specifically, these features distinguish our method from ligand-gated techniques that invariably rely on the exogenous addition of specific compounds, thus abolishing full genetic encoding and limiting their application scope. Our method rivals CRISPR/Cas9-based approaches in its ready adaptability to new target sequences through variation of the modular chimeric RNA. The technology thus unlocks optogenetic control of near-arbitrary gene products at the post-transcriptional level and expands the optogenetic toolbox. Notably, the shRNA-based approach operates dominantly and can hence be used in wild-type cellular backgrounds, thus obviating the laborious construction of transgenic lines. To facilitate adoption of the technology, we investigated in detail sequence determinants affecting the efficiency of light regulation. We demonstrate that single nucleotide variations in the hinge region connecting the miR/siRNA and the aptamer domains impact on regulatory RNA function and allow its fine-tuning, with an up to 15-fold change in protein expression presently. Although we observed a preference for A and U nucleotides of the best-performing shRNAs, we recommend testing all canonical nucleotides (G,U,A, and C) at the hinge region, upstream and downstream of the aptamer domain to identify the most suitable variant. Besides light-dependency, we also demonstrate spatial and temporal regulation and the suitability of the system to control endogenous proteins and cellular behavior, exemplified by controlling the cyclin B1 and CDK1 protein expression. This optoribogenetic approach extends to various shRNA and miR molecules for the investigation of dynamic biological processes by light, e.g., the relationship of proliferation and differentiation of neuronal stem cells, which depends on the progression of the cell cycle<sup>44</sup>. Additionally, optoribogenetic approaches may contribute to the understanding of dynamic micro RNA and protein functions that remain challenging to be resolved with the currently available methodologies.

295

## 296 **Acknowledgement**

297 This work was supported by funds from the European Union ERC ('OptoRibo', 615381) to  
298 G.M., and the German Research Council (grants MA3442/5-1 and 5-2 to G.M., and MO2192/6-  
299 1 to A.M.). We thank Prof. Gruss for critical commenting on the cell cycle data. The FACS  
300 core facility of the University Hospital Bonn is acknowledged for support in applying the gating  
301 strategy for the eGFP expression experiments.

302

## 303 **Author contributions**

304 S.P. designed the shRNAs, developed and performed all PAL-dependent experiments in  
305 mammalian cells and wrote the manuscript. C.M. performed the interaction studies of RNA  
306 molecules with PAL, M.C. performed the blinded studies, A.M. conceived the project and  
307 discussed experiments, G.M. conceived the study, supervised, discussed, designed the  
308 experiments and wrote the manuscript.

309

310

## 311 **Competing interest statement**

312 The authors declare no competing interests.

313

## 314 **References**

- 315 1. Meister, G. & Tuschl, T. Mechanisms of gene silencing by double-stranded RNA.  
316 *Nature* **431**, 343–349 (2004).
- 317 2. Zamore, P. D., Tuschl, T., Sharp, P. A. & Bartel, D. P. RNAi: double-stranded RNA  
318 directs the ATP-dependent cleavage of mRNA at 21 to 23 nucleotide intervals. *Cell*  
319 **101**, 25–33 (2000).
- 320 3. Hannon, G. J. RNA interference. *Nature* **418**, 244–251 (2002).
- 321 4. Sambandan, S. *et al.* Activity-dependent spatially localized miRNA maturation in  
322 neuronal dendrites. *Science* **355**, 634–637 (2017).
- 323 5. Wieland, M. & Hartig, J. S. Improved aptazyme design and in vivo screening enable  
324 riboswitching in bacteria. *Angew. Chem. Int. Ed. Engl.* **47**, 2604–2607 (2008).
- 325 6. Werstuck, G. & Green, M. R. Controlling gene expression in living cells through small  
326 molecule-RNA interactions. *Science* **282**, 296–298 (1998).
- 327 7. Boussebayle, A. *et al.* Next-level riboswitch development-implementation of Capture-  
328 SELEX facilitates identification of a new synthetic riboswitch. *Nucleic Acids Res.* **47**,  
329 4883–4895 (2019).
- 330 8. Topp, S. & Gallivan, J. P. Emerging applications of riboswitches in chemical biology.  
331 *ACS Chem. Biol.* **5**, 139–148 (2010).
- 332 9. Yen, L. *et al.* Exogenous control of mammalian gene expression through modulation of  
333 RNA self-cleavage. *Nature* **431**, 471–476 (2004).
- 334 10. Mello, C. C. & Conte, D. Revealing the world of RNA interference. *Nature* **431**, 338–  
335 342 (2004).

- 336 11. Dorsett, Y. & Tuschl, T. siRNAs: applications in functional genomics and potential as  
337 therapeutics. *Nat Rev Drug Discov* **3**, 318–329 (2004).
- 338 12. Kirkbride, R. C. *et al.* Maternal small RNAs mediate spatial-temporal regulation of  
339 gene expression, imprinting, and seed development in Arabidopsis. *Proc. Natl. Acad.*  
340 *Sci. U.S.A.* **116**, 2761–2766 (2019).
- 341 13. Bayer, T. S. & Smolke, C. D. Programmable ligand-controlled riboregulators of  
342 eukaryotic gene expression. *Nat. Biotechnol.* **23**, 337–343 (2005).
- 343 14. Szulc, J., Wiznerowicz, M., Sauvain, M.-O., Trono, D. & Aebischer, P. A versatile tool  
344 for conditional gene expression and knockdown. *Nat. Methods* **3**, 109–116 (2006).
- 345 15. Berger, S. M. *et al.* Quantitative analysis of conditional gene inactivation using  
346 rationally designed, tetracycline-controlled miRNAs. *Nucleic Acids Res.* **38**, e168–e168  
347 (2010).
- 348 16. Kumar, D., An, C.-I. & Yokobayashi, Y. Conditional RNA interference mediated by  
349 allosteric ribozyme. *J. Am. Chem. Soc.* **131**, 13906–13907 (2009).
- 350 17. Atanasov, J., Groher, F., Weigand, J. E. & Suess, B. Design and implementation of a  
351 synthetic pre-miR switch for controlling miRNA biogenesis in mammals. *Nucleic*  
352 *Acids Res.* **45**, e181–e181 (2017).
- 353 18. Ausländer, D., Wieland, M., Ausländer, S., Tigges, M. & Fussenegger, M. Rational  
354 design of a small molecule-responsive intramer controlling transgene expression in  
355 mammalian cells. *Nucleic Acids Res.* **39**, e155–e155 (2011).
- 356 19. Ebert, M. S., Neilson, J. R. & Sharp, P. A. MicroRNA sponges: competitive inhibitors  
357 of small RNAs in mammalian cells. *Nat. Methods* **4**, 721–726 (2007).
- 358 20. Fulga, T. A. *et al.* A transgenic resource for conditional competitive inhibition of  
359 conserved Drosophila microRNAs. *Nat Commun* **6**, 7279–10 (2015).
- 360 21. Horwich, M. D. & Zamore, P. D. Design and delivery of antisense oligonucleotides to  
361 block microRNA function in cultured Drosophila and human cells. *Nat Protoc* **3**,  
362 1537–1549 (2008).
- 363 22. Velagapudi, S. P., Gallo, S. M. & Disney, M. D. Sequence-based design of bioactive  
364 small molecules that target precursor microRNAs. *Nat. Chem. Biol.* **10**, 291–297  
365 (2014).
- 366 23. Dickins, R. A. *et al.* Tissue-specific and reversible RNA interference in transgenic  
367 mice. *Nat. Genet.* **39**, 914–921 (2007).
- 368 24. Mikat, V. & Heckel, A. Light-dependent RNA interference with nucleobase-caged  
369 siRNAs. *RNA* **13**, 2341–2347 (2007).
- 370 25. Shah, S., Jain, P. K., Kala, A., Karunakaran, D. & Friedman, S. H. Light-activated  
371 RNA interference using double-stranded siRNA precursors modified using a  
372 remarkable regiospecificity of diazo-based photolabile groups. *Nucleic Acids Res.* **37**,  
373 4508–4517 (2009).
- 374 26. Kala, A., Jain, P. K., Karunakaran, D., Shah, S. & Friedman, S. H. The synthesis of  
375 tetra-modified RNA for the multidimensional control of gene expression via light-  
376 activated RNA interference. *Nat Protoc* **9**, 11–20 (2014).
- 377 27. Christie, J. M. *et al.* Arabidopsis NPH1: a flavoprotein with the properties of a  
378 photoreceptor for phototropism. *Science* **282**, 1698–1701 (1998).
- 379 28. Weber, A. M. *et al.* A blue light receptor that mediates RNA binding and translational  
380 regulation. *Nat. Chem. Biol.* **15**, 1085–1092 (2019).
- 381 29. Lünse, C. E. *et al.* An aptamer targeting the apical-loop domain modulates pri-miRNA  
382 processing. *Angew. Chem. Int. Ed. Engl.* **49**, 4674–4677 (2010).
- 383 30. Tsutsumi, A., Kawamata, T., Izumi, N., Seitz, H. & Tomari, Y. Recognition of the pre-  
384 miRNA structure by Drosophila Dicer-1. *Nat. Struct. Mol. Biol.* **18**, 1153–1158 (2011).
- 385 31. Pofahl, M., Wengel, J. & Mayer, G. Multifunctional nucleic acids for tumor cell  
386 treatment. *Nucleic Acid Ther* **24**, 171–177 (2014).



- 387 32. Henique, C. *et al.* Genetic and pharmacological inhibition of microRNA-92a maintains  
388 podocyte cell cycle quiescence and limits crescentic glomerulonephritis. *Nat Commun*  
389 **8**, 1829–15 (2017).
- 390 33. Carbon, P. *et al.* A common octamer motif binding protein is involved in the  
391 transcription of U6 snRNA by RNA polymerase III and U2 snRNA by RNA  
392 polymerase II. *Cell* **51**, 71–79 (1987).
- 393 34. Börner, K. *et al.* Robust RNAi enhancement via human Argonaute-2 overexpression  
394 from plasmids, viral vectors and cell lines. *Nucleic Acids Res.* **41**, e199–e199 (2013).
- 395 35. MacRae, I. J., Zhou, K. & Doudna, J. A. Structural determinants of RNA recognition  
396 and cleavage by Dicer. *Nat. Struct. Mol. Biol.* **14**, 934–940 (2007).
- 397 36. Fire, A. *et al.* Potent and specific genetic interference by double-stranded RNA in  
398 *Caenorhabditis elegans*. *Nature* **391**, 806–811 (1998).
- 399 37. Warf, M. B., Johnson, W. E. & Bass, B. L. Improved annotation of *C. elegans*  
400 microRNAs by deep sequencing reveals structures associated with processing by  
401 Droscha and Dicer. *RNA* **17**, 563–577 (2011).
- 402 38. Gu, S. *et al.* The loop position of shRNAs and pre-miRNAs is critical for the accuracy  
403 of dicer processing in vivo. *Cell* **151**, 900–911 (2012).
- 404 39. Setten, R. L., Rossi, J. J. & Han, S.-P. The current state and future directions of RNAi-  
405 based therapeutics. *Nat Rev Drug Discov* **18**, 421–446 (2019).
- 406 40. Jackman, M., Lindon, C., Nigg, E. A. & Pines, J. Active cyclin B1-Cdk1 first appears  
407 on centrosomes in prophase. *Nat. Cell Biol.* **5**, 143–148 (2003).
- 408 41. Johnson, N. *et al.* Compromised CDK1 activity sensitizes BRCA-proficient cancers to  
409 PARP inhibition. *Nat. Med.* **17**, 875–882 (2011).
- 410 42. Groisman, I., Jung, M.-Y., Sarkissian, M., Cao, Q. & Richter, J. D. Translational  
411 control of the embryonic cell cycle. *Cell* **109**, 473–483 (2002).
- 412 43. Hockberger, P. E. *et al.* Activation of flavin-containing oxidases underlies light-  
413 induced production of H<sub>2</sub>O<sub>2</sub> in mammalian cells. *Proc. Natl. Acad. Sci. U.S.A.* **96**,  
414 6255–6260 (1999).
- 415 44. Zhao, C. *et al.* MicroRNA let-7b regulates neural stem cell proliferation and  
416 differentiation by targeting nuclear receptor TLX signaling. *Proc. Natl. Acad. Sci.*  
417 *U.S.A.* **107**, 1876–1881 (2010).
- 418
